# Supplementary material for: Transcriptome analysis during seed germination of elite Chinese bread wheat cultivar Jimai 20
Source: PubMed Central journal article supplement (PMC3923396; doi:10.1186/1471-2229-14-20), 2014-01-13
Supplement: 1471-2229-14-20-S8.pdf [file 1471-2229-14-20-S8.pdf]

Figure S3

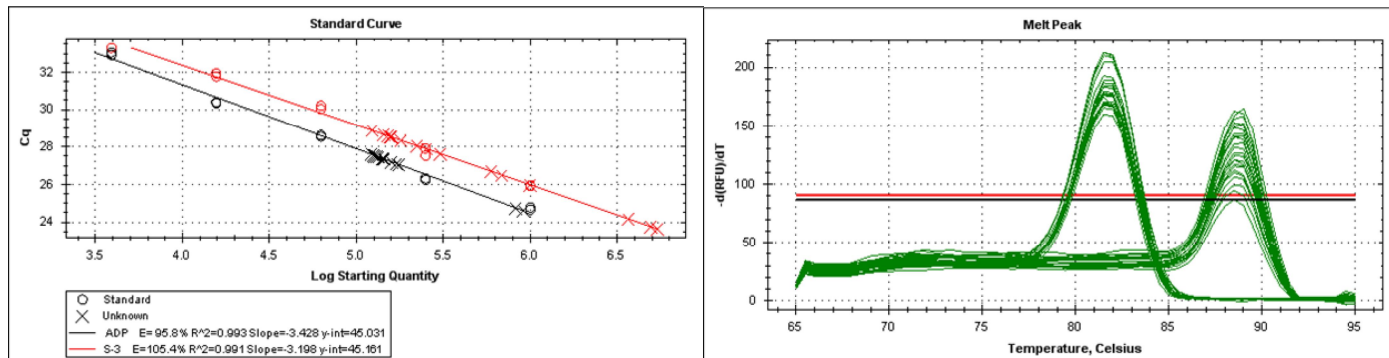

UTP-glucose-1-phosphate uridylyltransferase

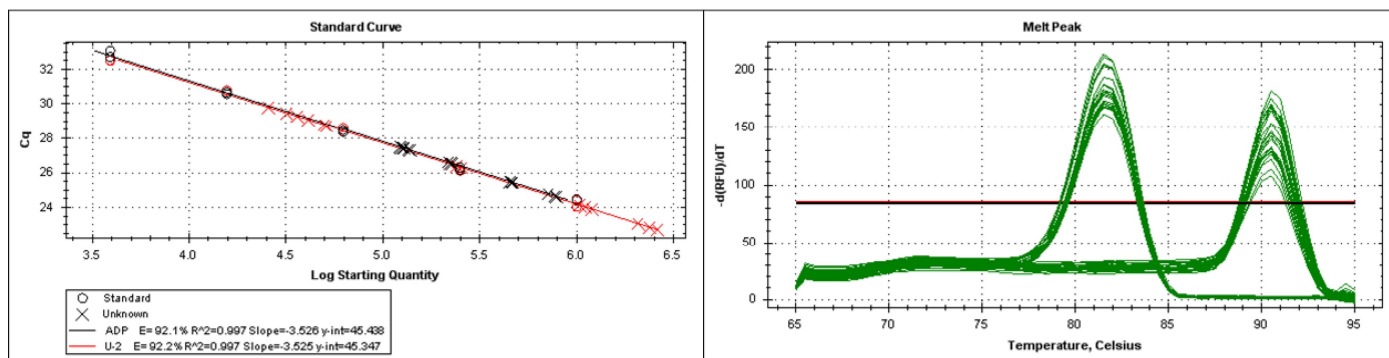

Hypothetical protein

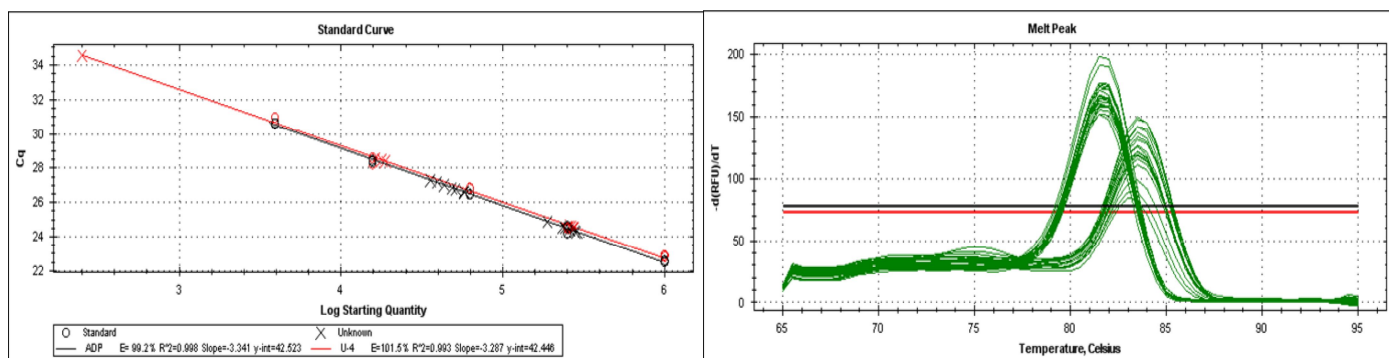

Histone H4

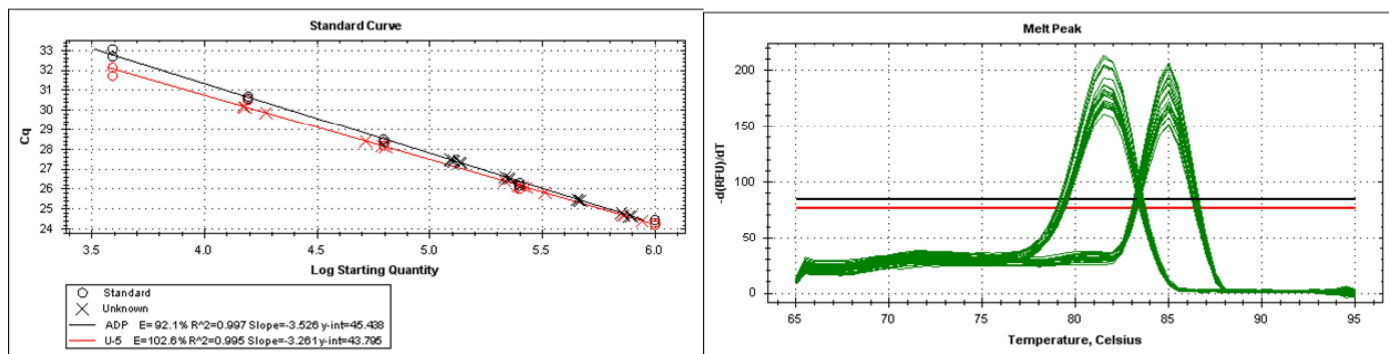

T-complex protein 1, delta subunit

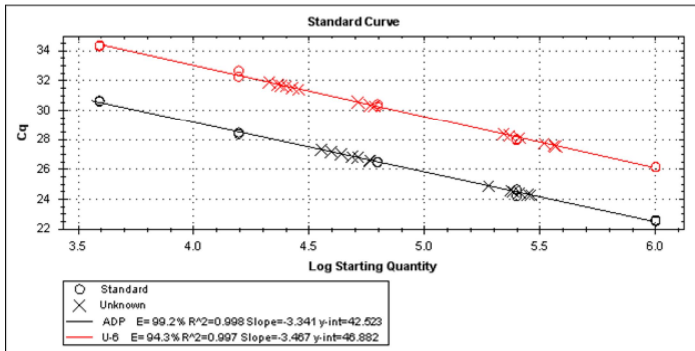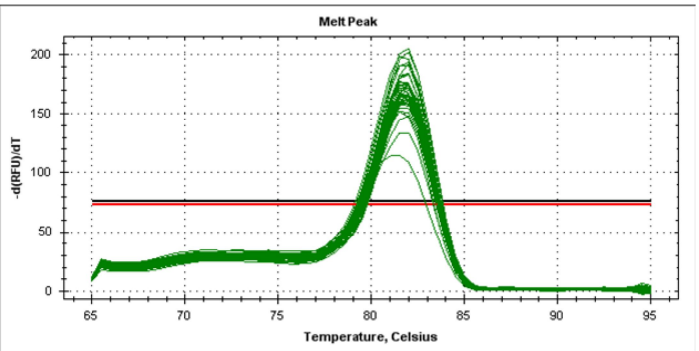

Ribosomal protein L13 containing protein

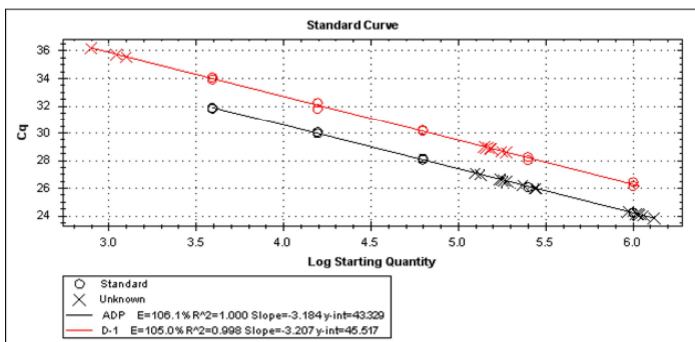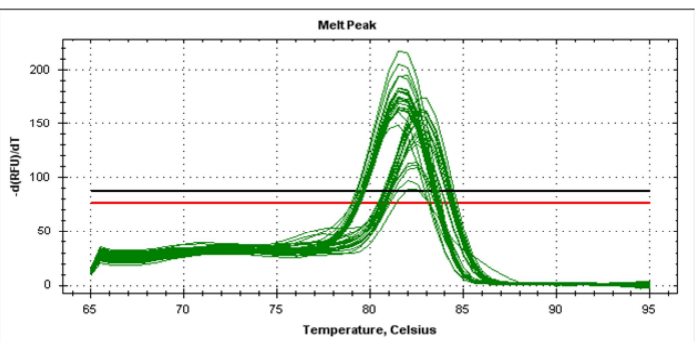

Embryonic abundant protein 1

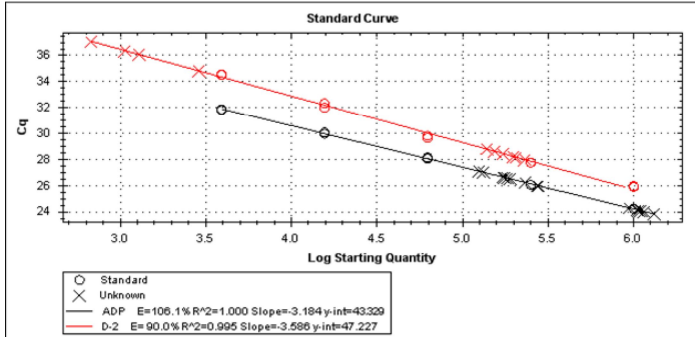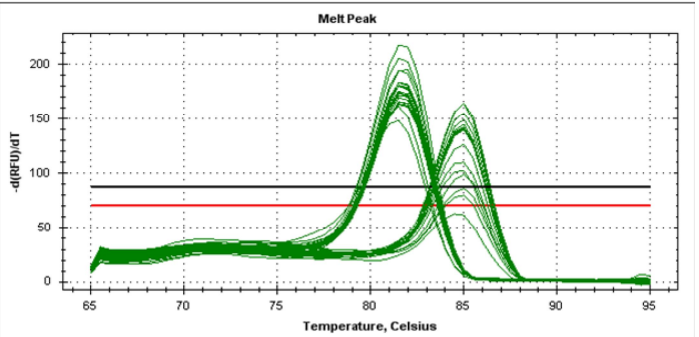

Vacuolar cation/proton exchanger 1b

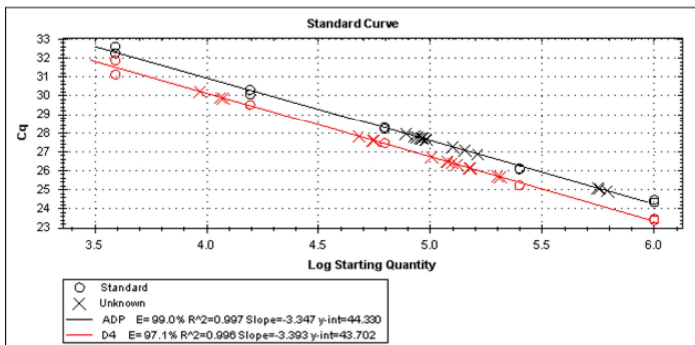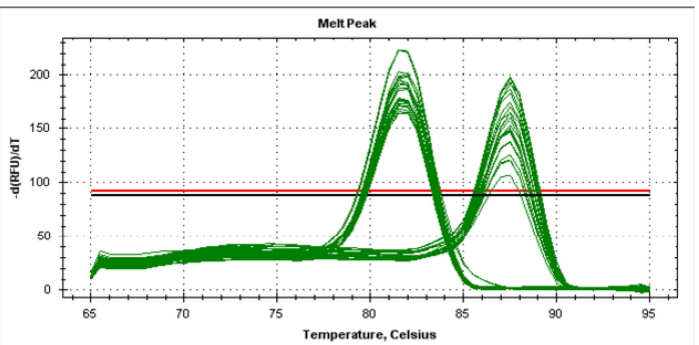

Late embryogenesis abundant protein Lea14-A

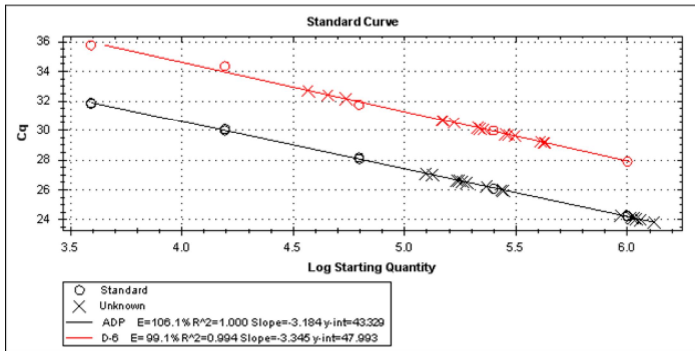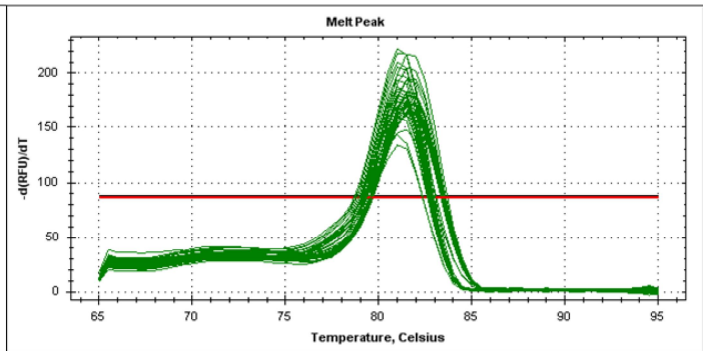

### Aldehyde dehydrogenase family protein

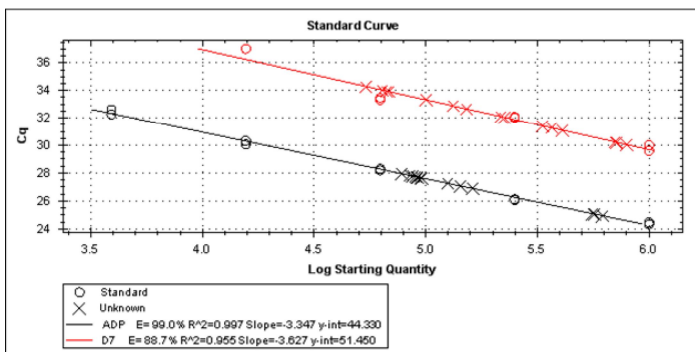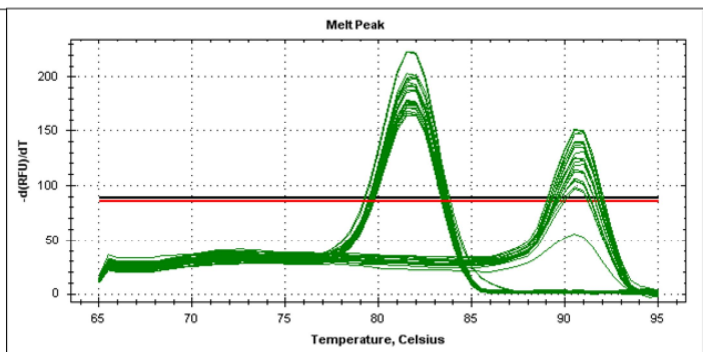

### AP2 domain containing protein

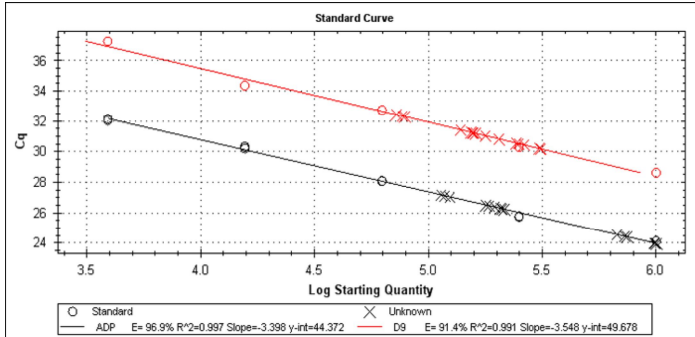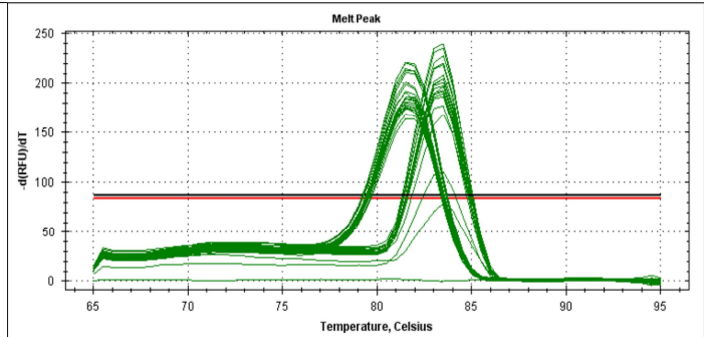

### NAD dependent epimerase or dehydratase family protein

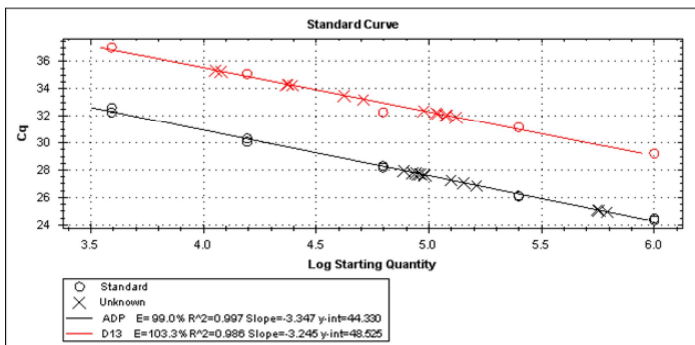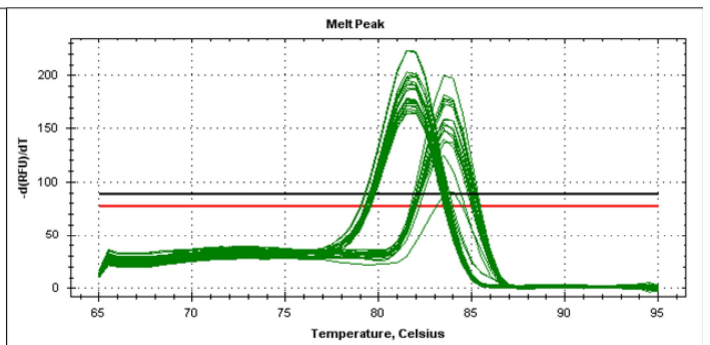

### Polyubiquitin containing 7 ubiquitin monomers
