# Supplementary material for: Transcriptome analysis during seed germination of elite Chinese bread wheat cultivar Jimai 20
Source: PubMed Central journal article supplement (PMC3923396; doi:10.1186/1471-2229-14-20), 2014-01-13

Figure S5

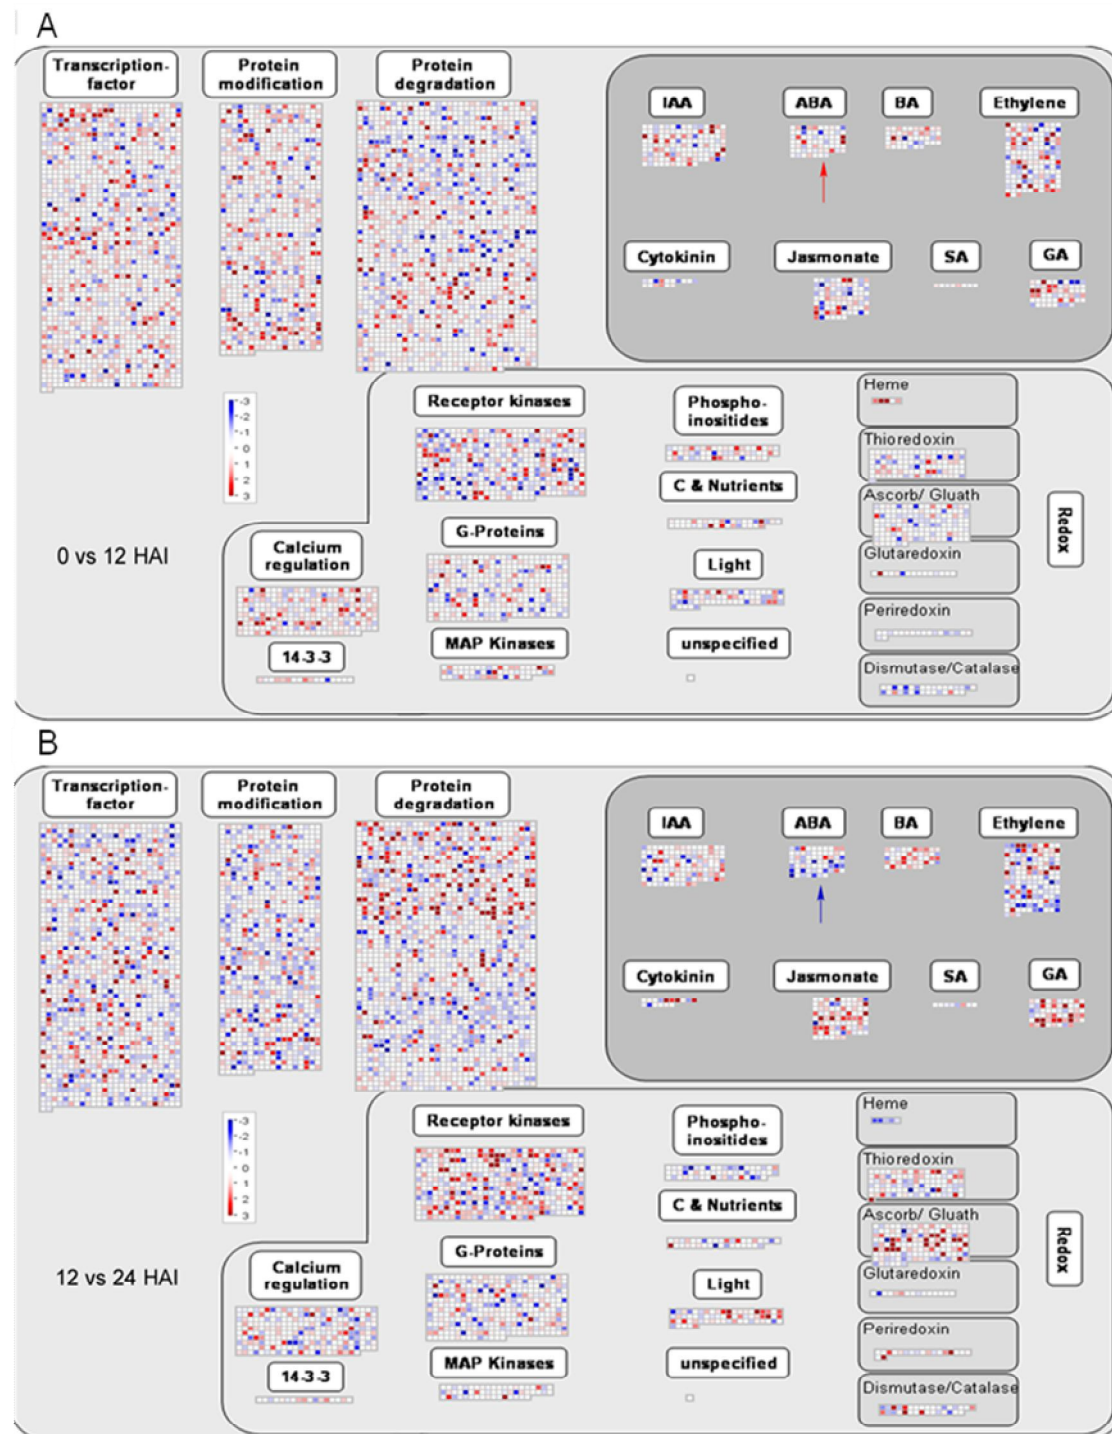

C

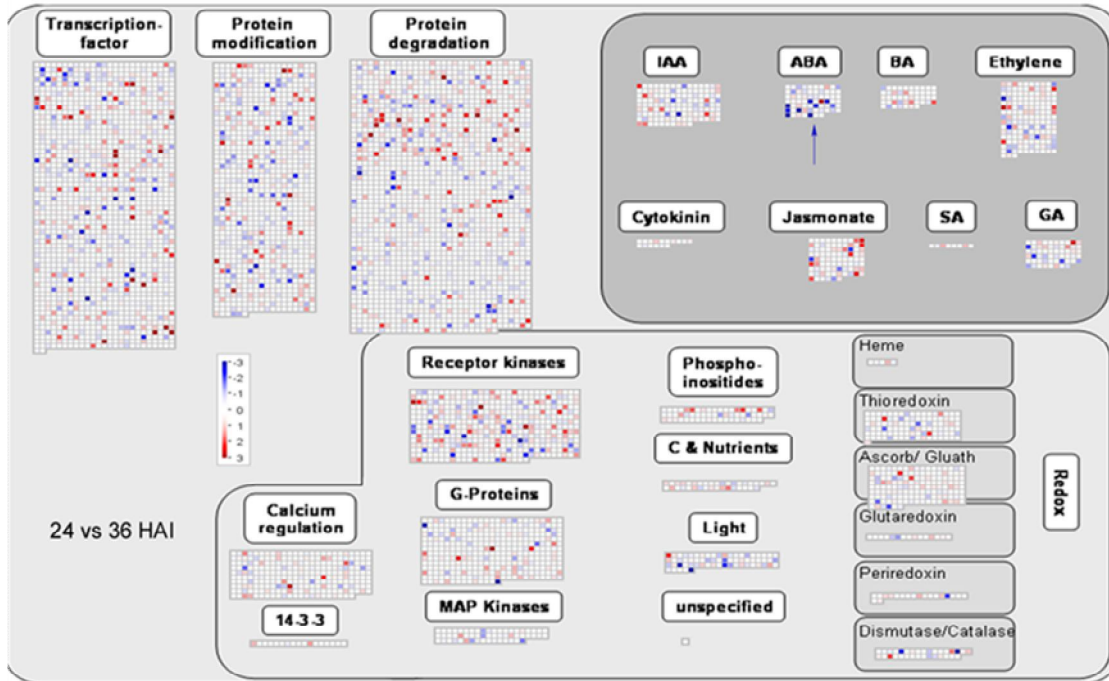

D

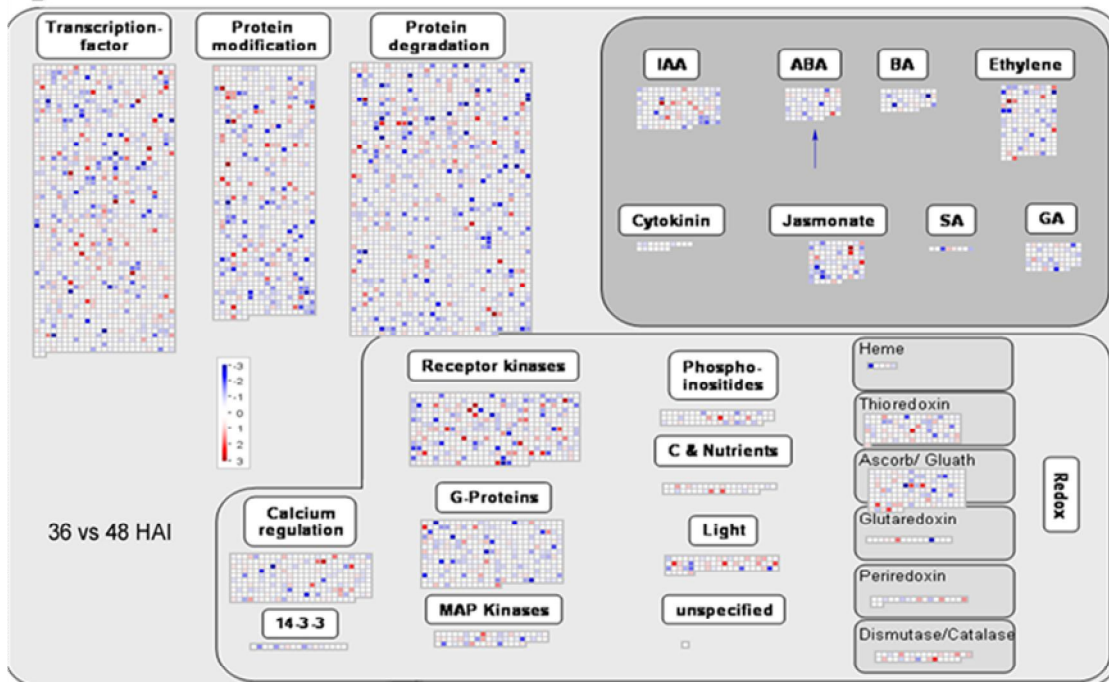

Supplement: 1471-2229-14-20-S10.pdf [file 1471-2229-14-20-S10.pdf]
